# Supplementary material for: Comparative genomics reveals new functional insights in uncultured MAST species
Source: PubMed Central journal article supplement (PMC8163842; doi:10.1038/s41396-020-00885-8), 2021-01-15

# MAST-1C-sp1

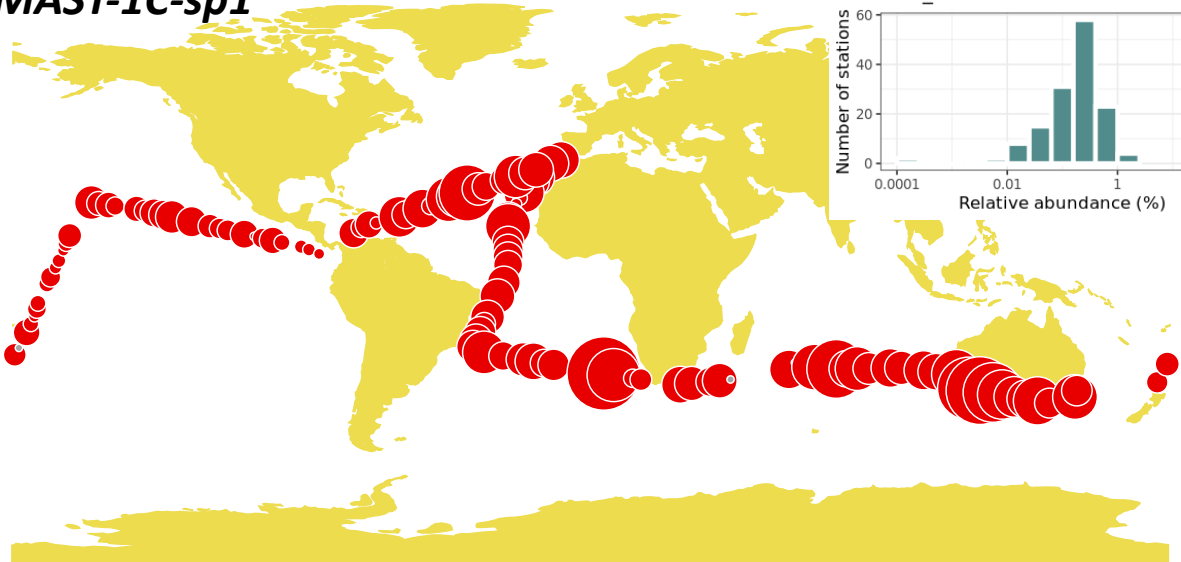

# MAST-1D-sp1

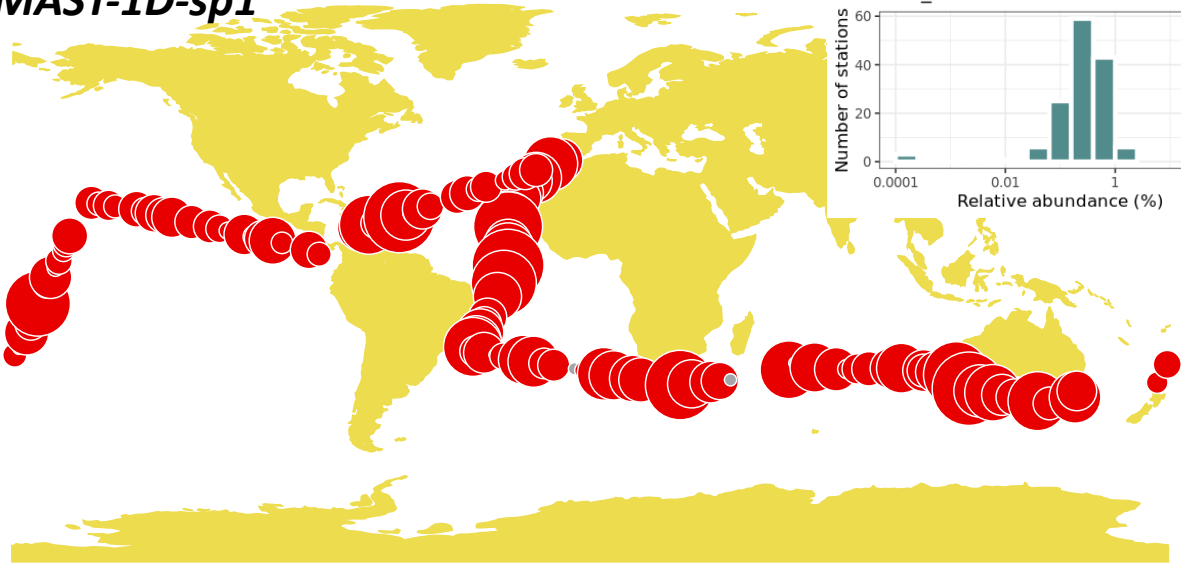

# MAST-1D-sp2

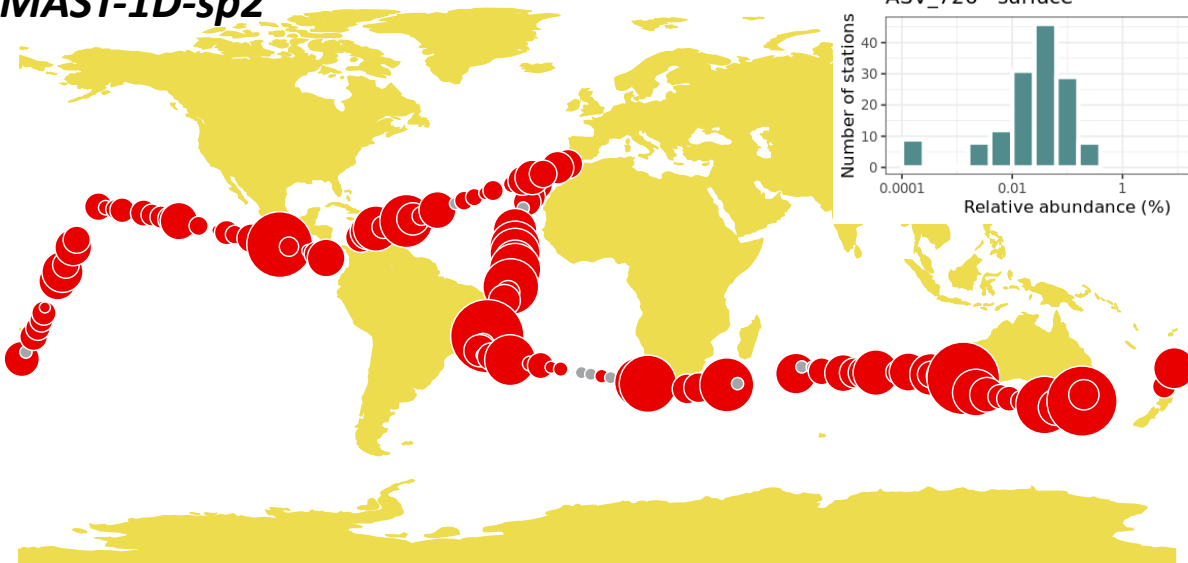

# MAST-3A-sp1

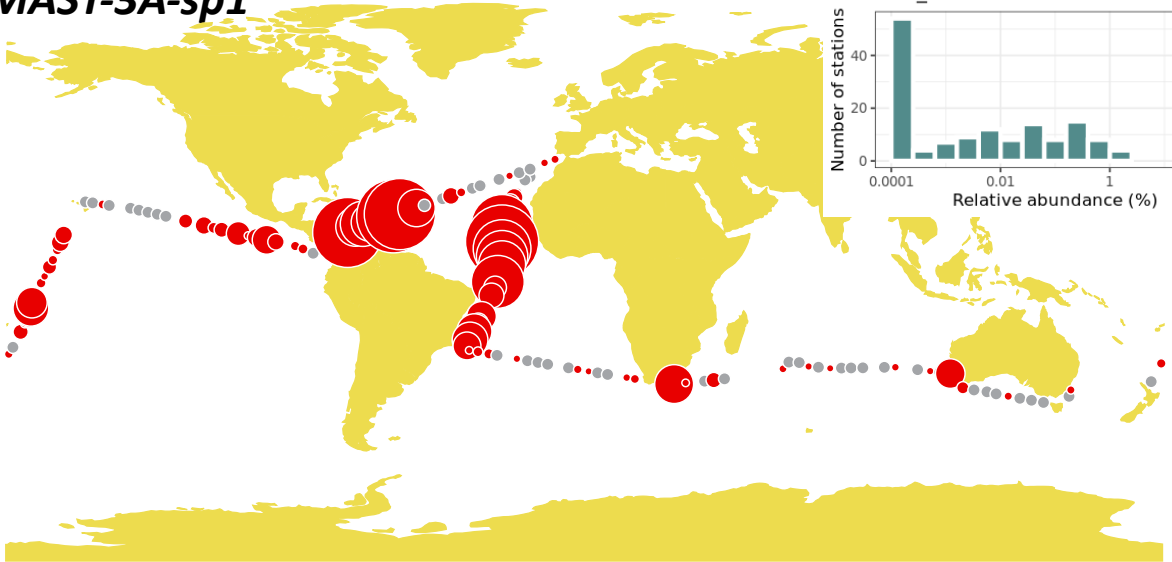

# MAST-3C-sp1

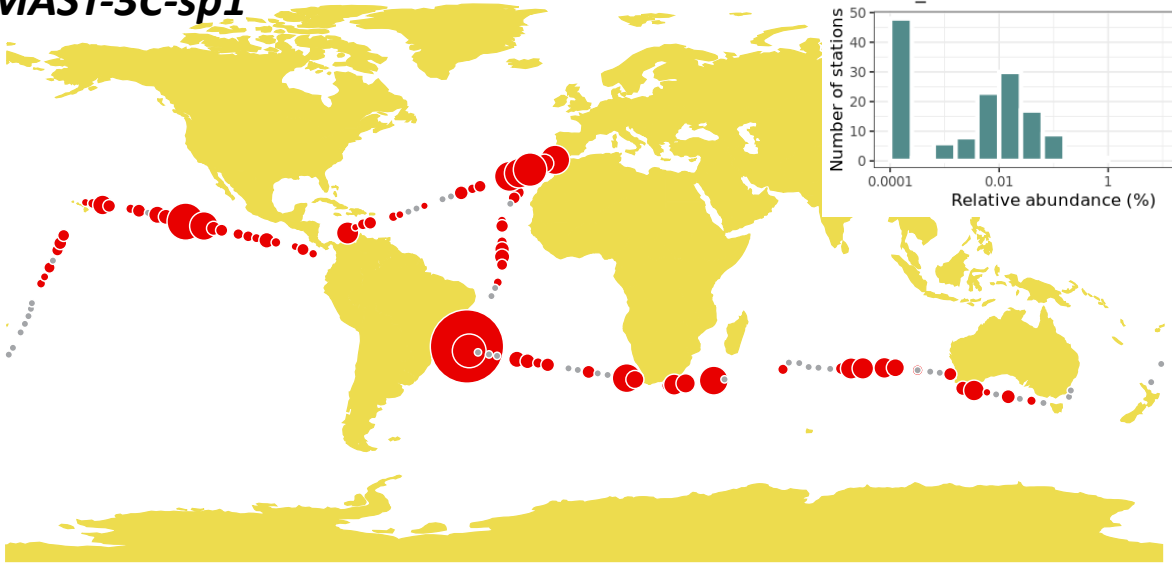

# MAST-3C-sp2

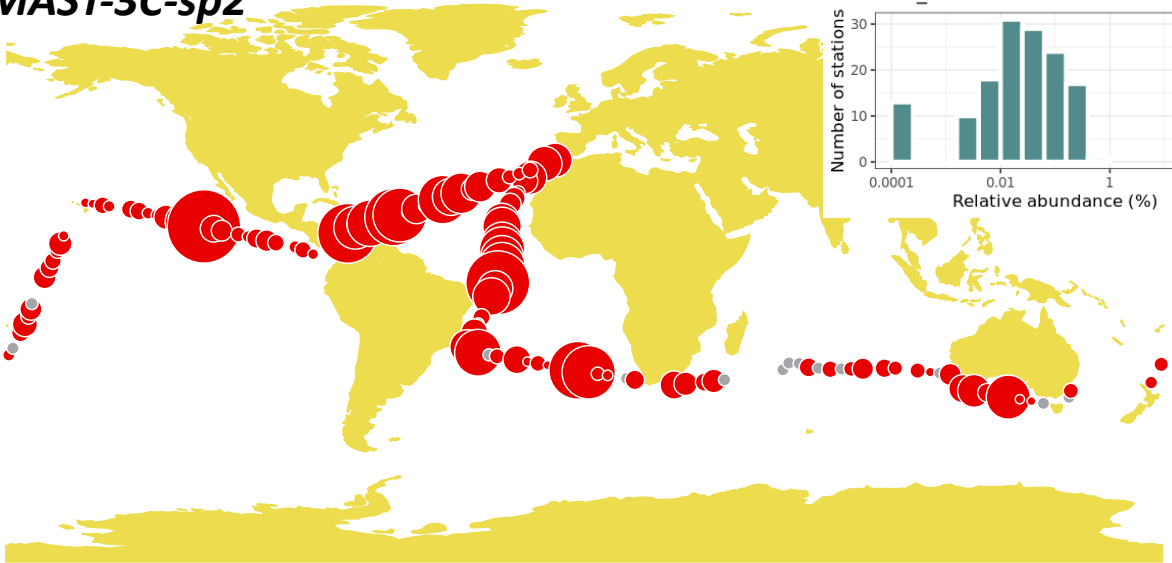

### MAST-3F-sp1

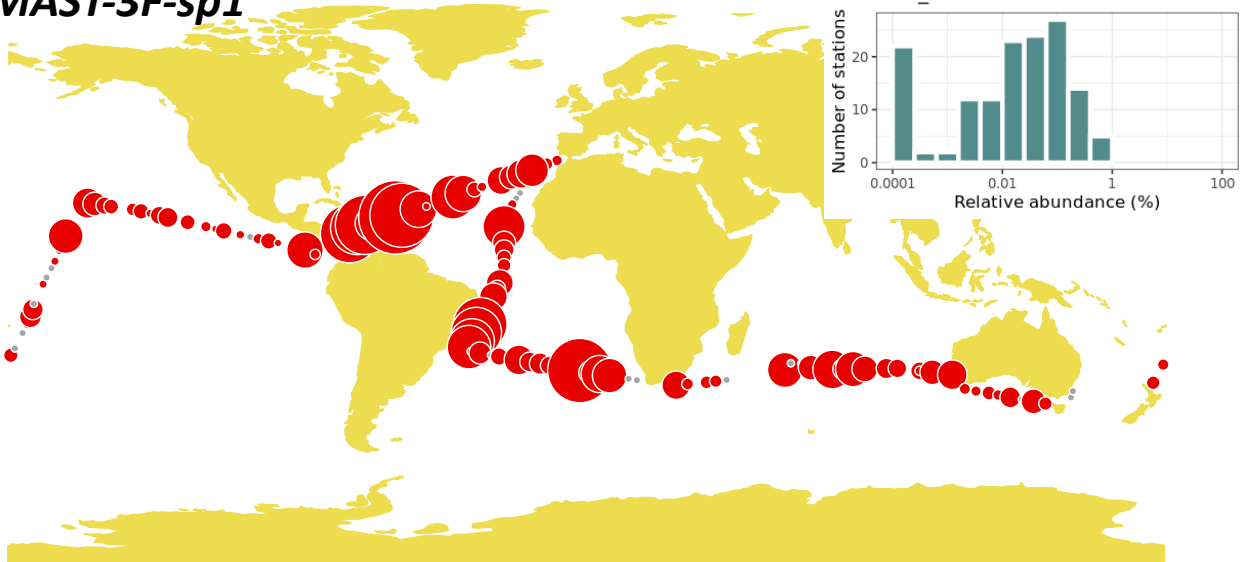

### MAST-4A-sp1

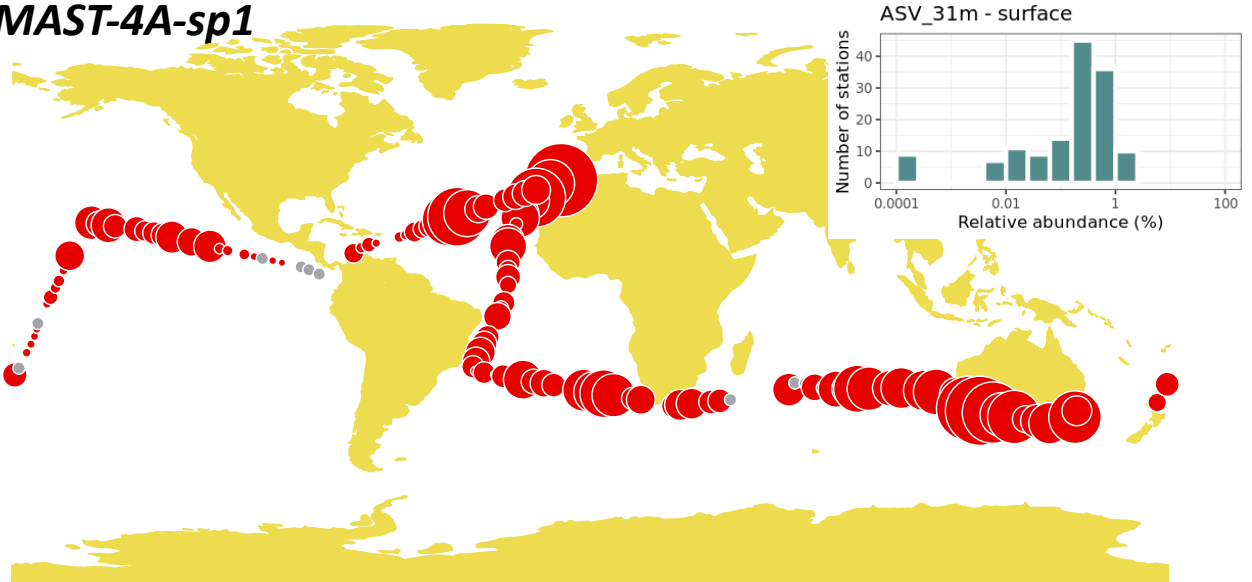

### MAST-4B-sp1

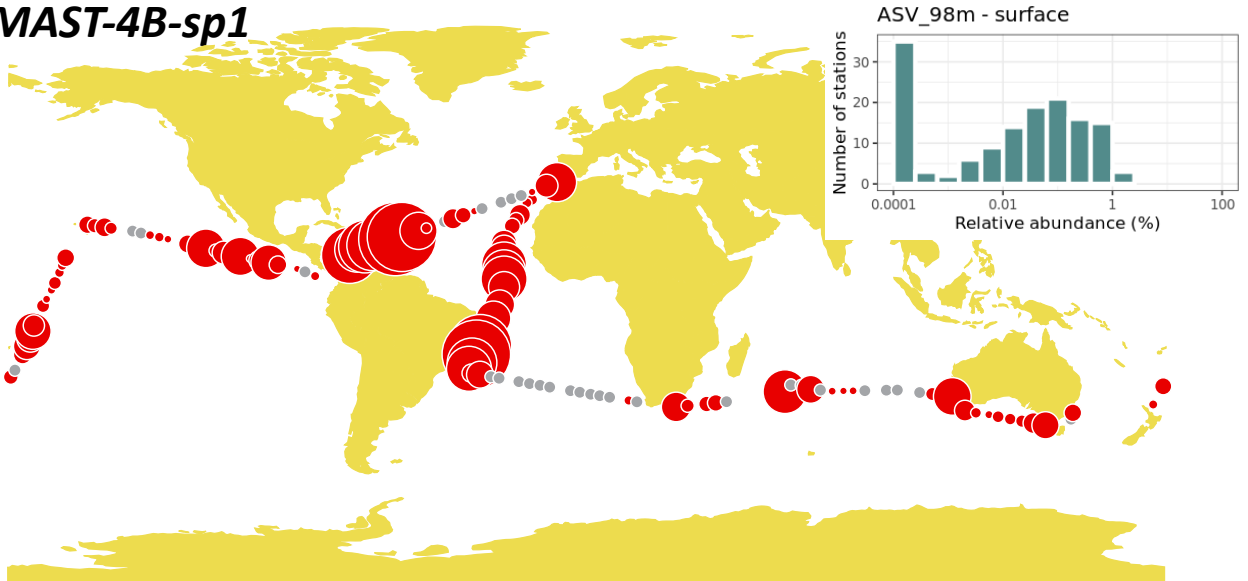

# MAST-4C-sp1

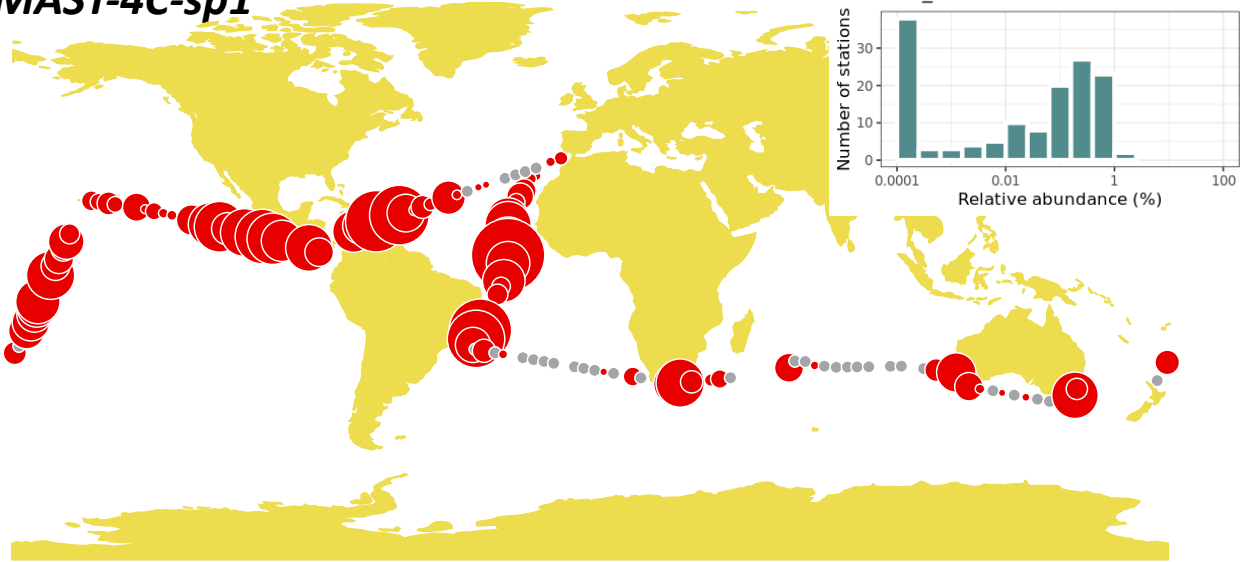

# MAST-4E-sp1

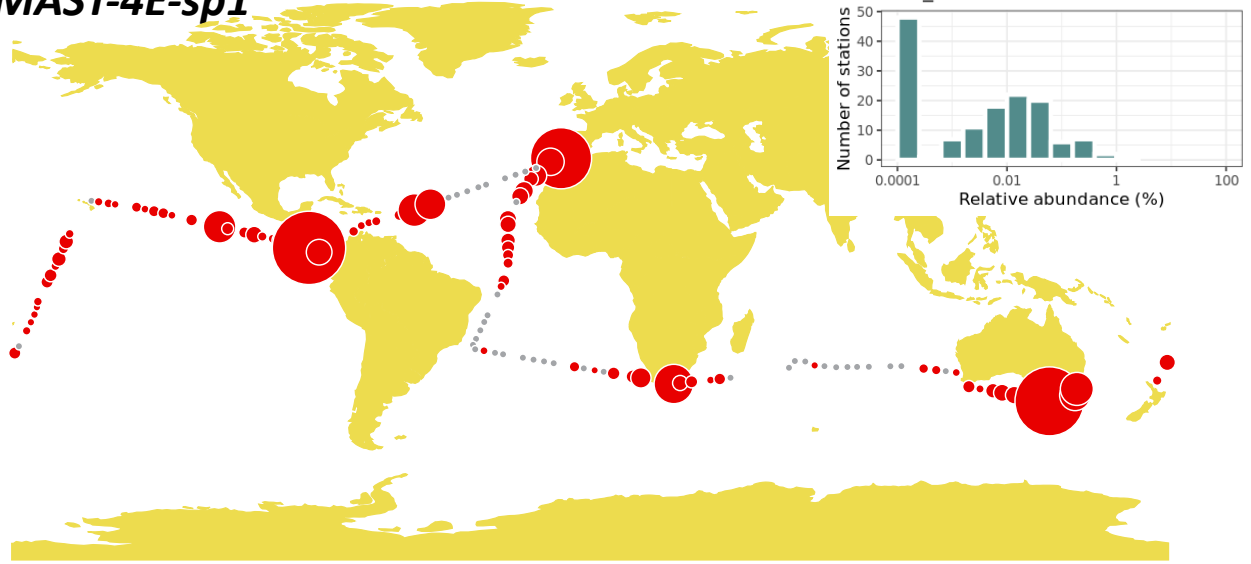

# MAST-7B-sp1

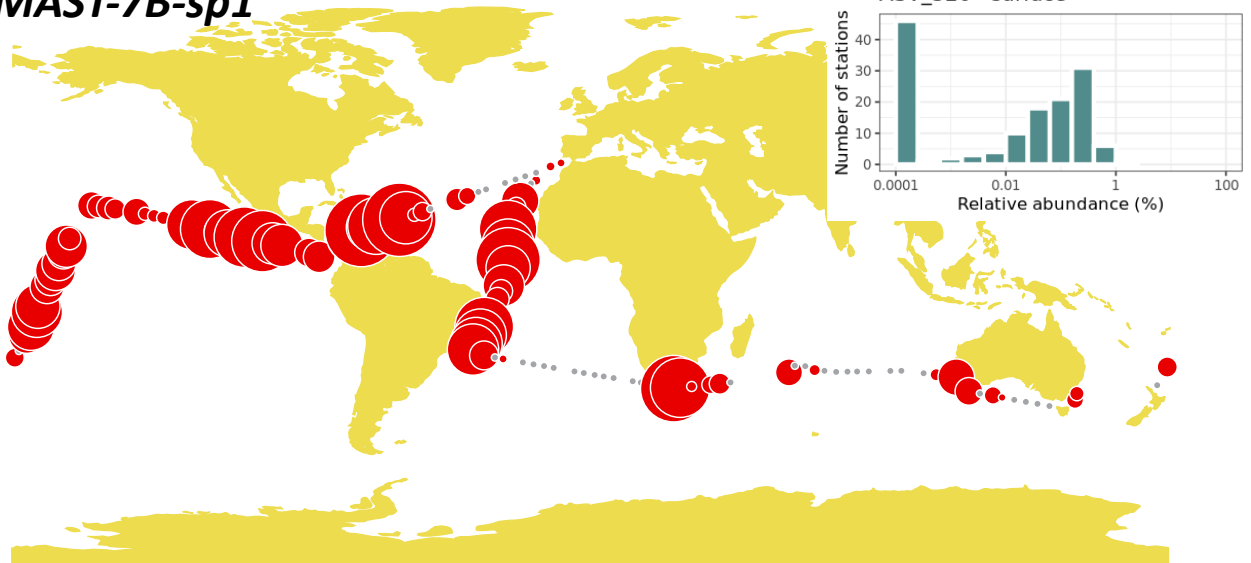

# MAST-8B-sp1

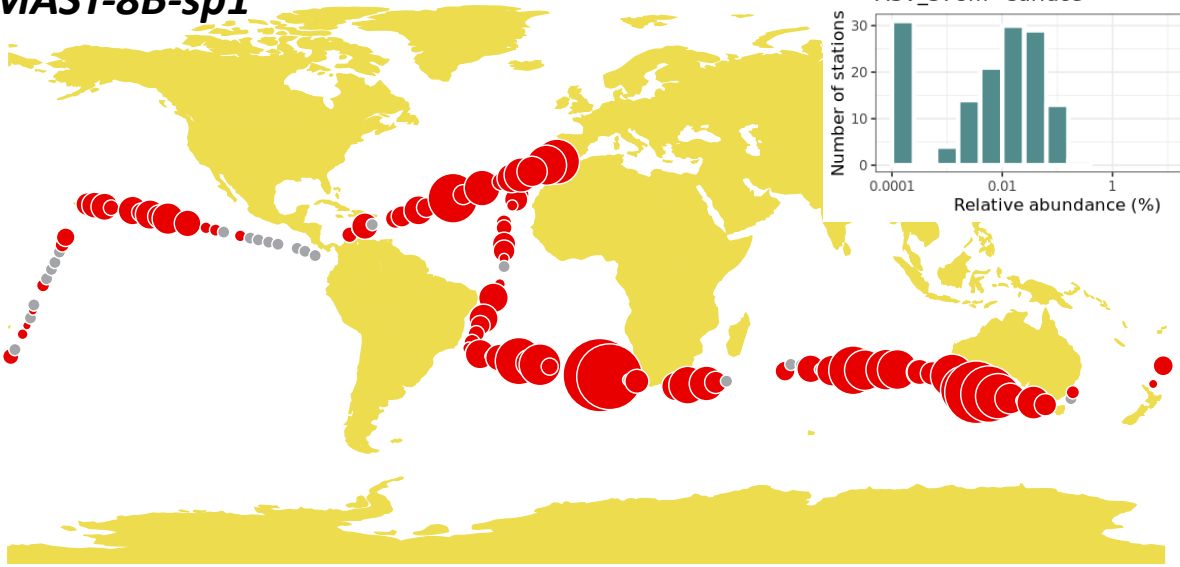

# MAST-9A-sp1

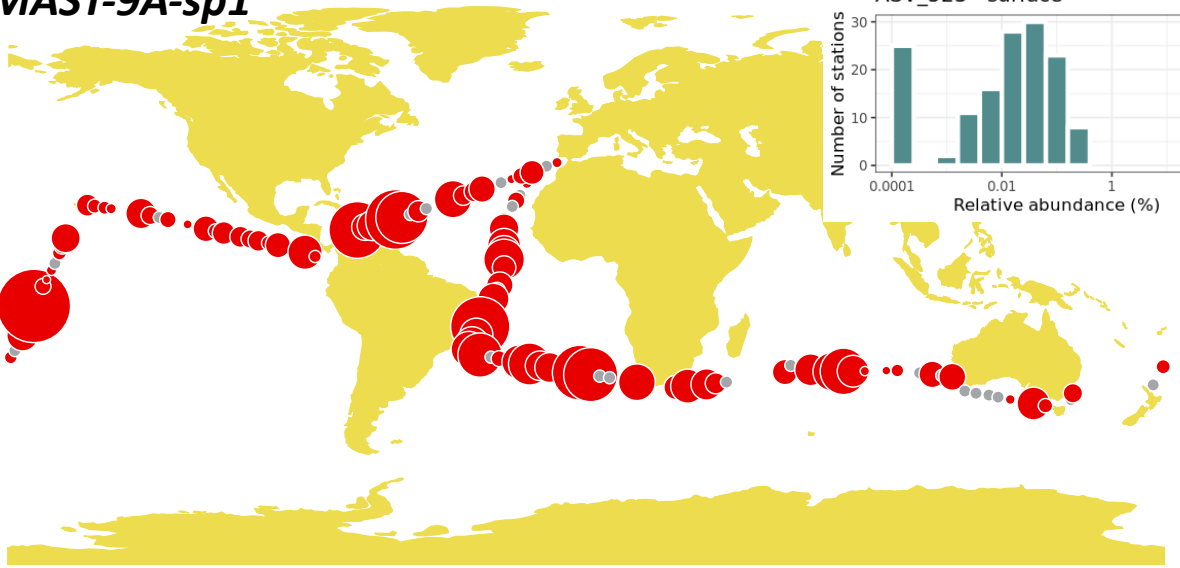

# MAST-11-sp1

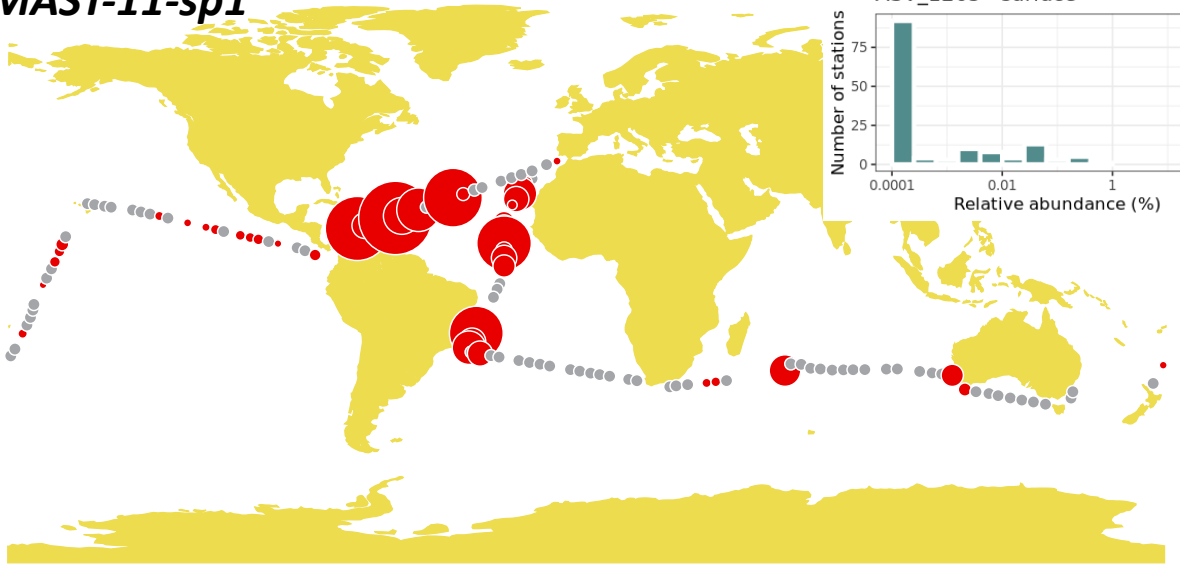

Supplement: 41396_2020_885_MOESM3_ESM.pdf [file 41396_2020_885_MOESM3_ESM.pdf]
