# Supplementary material for: Comparative genomics reveals new functional insights in uncultured MAST species
Source: PubMed Central journal article supplement (PMC8163842; doi:10.1038/s41396-020-00885-8), 2021-01-15

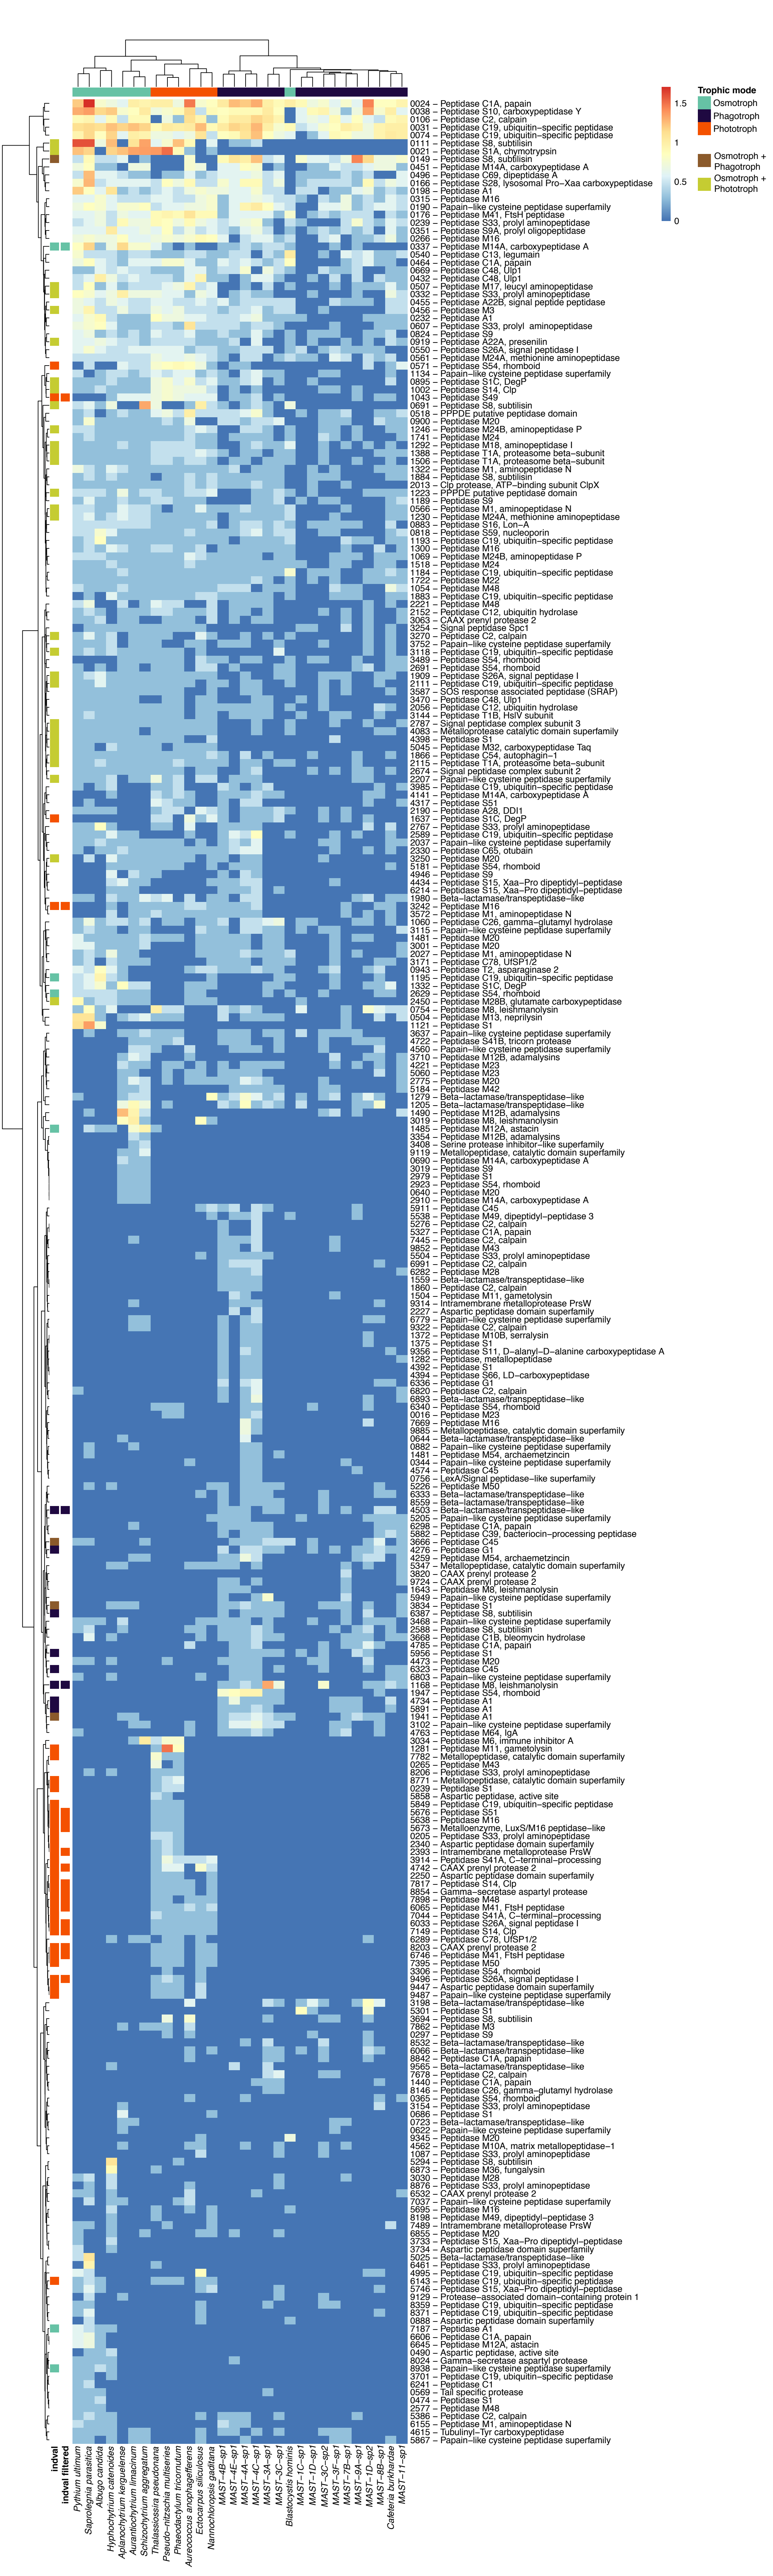

Supplement: 41396_2020_885_MOESM6_ESM.pdf [file 41396_2020_885_MOESM6_ESM.pdf]
